# Supplementary material for: A tamB homolog is involved in maintenance of cell envelope integrity and stress resistance of Deinococcus radiodurans
Source: PubMed Central journal article supplement (PMC5382914; doi:10.1038/srep45929), 2017-04-06

# Supporting Information

**A *tamB* homolog is involved in maintenance of cell envelope integrity and stress  
resistance of *Deinococcus radiodurans***

Jiangliu Yu, Tao Li, Shang Dai, Yulan Weng, Jiulong Li, Qinghao Li, Hong Xu\*,  
Yuejin Hua, Bing Tian\*

Key Laboratory for Nuclear-Agricultural Sciences of Chinese Ministry of Agriculture  
and Zhejiang Province, Institute of Nuclear-Agricultural Sciences, Zhejiang  
University, Hangzhou, China

\**Corresponding author:* Bing Tian (tianbing@zju.edu.cn); Hong Xu  
(xuhong1685@163.com), Institute of Nuclear-Agricultural Sciences, Zhejiang  
University, No.268, Kaixuan Road, 310029 Hangzhou, China, Tel/Fax:  
+86-571-86971215

**Table S1. Plasmids and strains used in the experiments.**

| <b>Plasmids</b>             | <b>Description</b>                                    | <b>Source</b>    |
|-----------------------------|-------------------------------------------------------|------------------|
| pEASY-Blunt                 | <i>E. coli</i> cloning plasmid                        | Transgen (China) |
| CBP-HAT-GST                 | GST containing plasmid                                | Lab stock        |
| pRADK                       | <i>E. coli</i> – <i>D. radiodurans</i> shuttle vector | Lab stock        |
| pMD18-T Vector              | Streptomycin resistant gene containing plasmid        | Lab stock        |
| <b>Strains</b>              | <b>Description</b>                                    | <b>Source</b>    |
| <i>E. coli</i> DH5 $\alpha$ | <i>E. coli</i> cloning strain                         | Transgen (China) |
| <i>E. coli</i> Trans T1     | <i>E. coli</i> cloning strain                         | Transgen (China) |
| <i>D. radiodurans</i> R1    | <i>Deinococcus radiodurans</i> wild-type, ATCC 13939  | Lab stock        |

**Table S2. Primers used in the experiments.**

| <b>Re-sequencing primers</b> | <b>Sequence</b>            |
|------------------------------|----------------------------|
| P1-F                         | GTTGTGACCTGCGGCGTG         |
| P1-R                         | GCGCCGCGCTCGG              |
| P2-F                         | CGCCCGGCTCAACCTG           |
| P2-R                         | GAGCACGGTCACGCCG           |
| P3-F                         | GGAGTTGCGGGCGACC           |
| P3-R                         | CGTCGGAGGTCAGATGCAGG       |
| P4-F                         | ACCTGCATCTGACCTCCGAC       |
| P4-R                         | GCGGTGGCTCGCACG            |
| P5-F                         | CGGGCGCCACGCTG             |
| P5-R                         | CGCTCAGCTCGTGCCC           |
| P6-F                         | GGCACCTGACCGGCG            |
| P6-R                         | CGCTGAGGGTGCCCC            |
| P7-F                         | GGCACTCAGAGCGGGGC          |
| P7-R                         | GTCCCGCTCGCCCCG            |
| P8-F                         | GGCCAGCCTGACCCGG           |
| P8-R                         | TCACGTTTTTCGGCGCG          |
| P9-F                         | GCTGCAACTCATTCCGTCG        |
| P9-R                         | GTGGAATAGGTCGCGTCGA        |
| P10-F                        | GGCACCGACGGCAACG           |
| P10-R                        | ATGAACTCGTTCCAGGTGCC       |
| <b>Gene knockout primers</b> | <b>Sequence</b>            |
| $\Delta$ DR_146T-P1          | GTTGTGACCTGCGGCGTG         |
| $\Delta$ DR_146T-P2          | TATGGATCCGAGTCCCGCCCCGGTG  |
| $\Delta$ DR_146T-P3          | TATAAGCTTGGCCAACCTCCCCGGC  |
| $\Delta$ DR_146T-P4          | GCACGATGAACTCGTTCCAGG      |
| $\Delta$ DR_146T-P5          | CGCTCTACCAGAACGAACCG       |
| $\Delta$ DR_146T-P6          | CTCTGAGCCGGAATGACCAC       |
| $\Delta$ DUF490-P1           | GCGCCGGGGCGAC              |
| $\Delta$ DUF490-P2           | TATGGATCCTCACCCGGATGCGCTC  |
| $\Delta$ DUF490-P3           | TATAAGCTTGGCCAACCTCCCCGGC  |
| $\Delta$ DUF490-P4           | GCACGATGAACTCGTTCCAGG      |
| $\Delta$ DUF490-P5           | CGCTGCCCCGAGGAATACA        |
| $\Delta$ DUF490-P6           | CAAGGTTGCTGCCGAGGTT        |
| $\Delta$ TamB-DUF490-P1      | GACCTGCGGGCGGTCAT          |
| $\Delta$ TamB-DUF490-P2      | TATGGATCCTCAGGCCGCCTGCCG   |
| $\Delta$ TamB-DUF490-P3      | TATAAGCTTGTGGTCACCGGGCCG   |
| $\Delta$ TamB-DUF490-P4      | GAGCGTCCAGCCTTGCTC         |
| $\Delta$ TamB-DUF490-P5      | GCCGGACATCACCTGGAAG        |
| $\Delta$ TamB-DUF490-P6      | CGGTTGCCGTGACTTTGG         |
| $\Delta$ DR_2577-P1          | AGTCTGATCGCTCTTACCACGG     |
| $\Delta$ DR_2577-P2          | CGGGATCCTTGACGGTTTCGACGCGA |
| $\Delta$ DR_2577-P3          | CCAAGCTTCAACGCCCTGGTCAAGGA |

|                             |                                                             |
|-----------------------------|-------------------------------------------------------------|
| $\Delta$ DR_2577-P4         | ACCTTGTAGCTGATCTTGAAGGTCT                                   |
| $\Delta$ DR_2577-P5         | CCGTTATCGTGACCTTGGG                                         |
| $\Delta$ DR_2577-P6         | CGTTATTGGCGTCGGTGTAG                                        |
| <b>Tags labeled primers</b> | <b>Sequence</b>                                             |
| DR_2577-His-P1              | ACGACGGGCGATTTTCAG                                          |
| DR_2577-His-P2              | ATAGGATCCTTAGTGATGATGATGATGATGGAA<br>GTTGACCTTGTAGCTGATCTTG |
| DR_2577-His-P3              | TATAAGCTTAGCCCCTAGTTCCCGGC                                  |
| DR_2577-His-P4              | CGGGCTGCGGAAGTGC                                            |

**Table S3. Homologous proteins of DR\_146T in some sequenced *Deinococcus* bacteria**

| <b>Species and gene number</b>         | <b>Annotation</b>                         | <b>Length (aa)</b> |
|----------------------------------------|-------------------------------------------|--------------------|
| <i>D. gobiensis</i> : DGo_CA2115       | Hypothetical protein                      | 3354               |
| <i>D. actinosclerus</i> : AUC44_09250  | Hypothetical protein                      | 3273               |
| <i>D. soli</i> : SY84_03150            | Hypothetical protein                      | 3256               |
| <i>D. puniceus</i> : SU48_10085        | Hypothetical protein                      | 3650               |
| <i>D. geothermalis</i> : Dgeo_0508     | Protein of unknown function DUF490        | 3243               |
| <i>D. swuensis</i> : QR90_10050        | Hypothetical protein                      | 3272               |
| <i>D. deserti</i> : Deide_16100        | Conserved hypothetical protein, precursor | 3511               |
| <i>D. proteolyticus</i> : Deipr_1576   | Protein of unknown function DUF490        | 3676               |
| <i>D. maricopenensis</i> : Deima_1996  | Protein of unknown function DUF490        | 3180               |
| <i>D. peraridilitoris</i> : Deipe_3733 | Hypothetical protein                      | 3146               |

Sequence information of the homologs were obtained by BLAST searching in the NCBI database (<http://www.ncbi.nlm.nih.gov>) using DR\_146T as the query gene. The annotated homologs in the database that showed more than 25% identity (protein sequence) are listed.

**Table S4. Proteins identified in the cell envelope of *D. radiodurans* wild type by MS**

| <b>Gene Number</b> | <b>Protein Description</b>                                                       | <b>Relative Abundance Index<sup>a</sup></b> |
|--------------------|----------------------------------------------------------------------------------|---------------------------------------------|
| <b>DR_2577</b>     | <b>S-layer protein</b>                                                           | ++++                                        |
| <b>DR_0383</b>     | <b>S-layer-like array-like protein</b>                                           | +++                                         |
| <b>DR_1185</b>     | <b>S-layer-like array-like protein</b>                                           | +++                                         |
| <b>DR_1115</b>     | <b>S-layer-like array-like protein</b>                                           | +++                                         |
| <b>DR_2508</b>     | <b>hexagonally packed intermediate-layer surface protein</b>                     | +++                                         |
| <b>DR_1124</b>     | <b>SLH family protein</b>                                                        | +                                           |
| <b>DR_0379</b>     | <b>outer membrane protein</b>                                                    | +++                                         |
| DR_0989            | cationic outer membrane protein OmpH                                             | +                                           |
| <b>DR_0630</b>     | <b>cell division protein FtsA</b>                                                | +                                           |
| <b>DR_0631</b>     | <b>cell division protein FtsZ</b>                                                | +                                           |
| <b>DR_0774</b>     | <b>general secretion pathway protein D</b>                                       | +++                                         |
| <b>DR_1460</b>     | <b>hypothetical protein</b>                                                      | +                                           |
| <b>DR_1461</b>     | <b>hypothetical protein</b>                                                      | +                                           |
| <b>DR_1462</b>     | <b>hypothetical protein</b>                                                      | +                                           |
| DR_0986            | extracellular solute-binding protein                                             | +                                           |
| DR_1290            | extracellular solute-binding protein                                             | +                                           |
| DR_1712            | extracellular solute-binding protein                                             | +                                           |
| DR_1955            | extracellular solute-binding protein                                             | +                                           |
| DR_A0246           | extracellular solute-binding protein                                             | +                                           |
| DR_0561            | maltose ABC transporter periplasmic maltose-binding protein                      | ++                                          |
| DR_0564            | amino acid ABC transporter periplasmic amino acid-binding protein                | ++                                          |
| DR_0788            | branched-chain amino acid ABC transporter periplasmic amino acid-binding protein | ++                                          |
| DR_1038            | branched-chain amino acid ABC transporter periplasmic amino acid-binding protein | ++                                          |
| DR_B0014           | hemin ABC transporter, periplasmic hemin-binding protein                         | ++                                          |
| DR_B0125           | iron ABC transporter substrate-binding protein                                   | ++                                          |
| DR_0363            | peptide ABC transporter periplasmic peptide-binding protein                      | +                                           |
| DR_0365            | peptide ABC transporter permease                                                 | +                                           |
| DR_1571            | peptide ABC transporter periplasmic peptide-binding protein                      | +                                           |
| DR_0959            | peptide ABC transporter permease                                                 | +                                           |
| DR_1027            | amino acid ABC transporter, periplasmic amino acid-binding protein               | +                                           |

---

|          |                                                                                  |      |
|----------|----------------------------------------------------------------------------------|------|
| DR_1277  | ABC transporter periplasmic substrate-binding protein                            | +    |
| DR_2154  | amino acid ABC transporter periplasmic amino acid-binding protein                | +    |
| DR_2278  | amino acid ABC transporter periplasmic amino acid-binding protein                | +    |
| DR_2588  | iron ABC transporter periplasmic substrate-binding protein                       | +    |
| DR_A0210 | peptide ABC transporter, periplasmic peptide-binding protein                     | +    |
| DR_A0263 | branched-chain amino acid ABC transporter periplasmic amino acid-binding protein | +    |
| DR_0695  | v-type ATP synthase subunit I                                                    | ++   |
| DR_0700  | v-type ATP synthase subunit A                                                    | ++   |
| DR_0697  | v-type ATP synthase subunit E                                                    | ++   |
| DR_0699  | v-type ATP synthase subunit F                                                    | ++   |
| DR_0701  | v-type ATP synthase subunit B                                                    | +    |
| DR_0698  | v-type ATP synthase subunit C                                                    | +    |
| DR_1536  | serine protease                                                                  | ++   |
| DR_1459  | serine protease                                                                  | +    |
| DR_2518  | serine/threonine protein kinase                                                  | +    |
| DR_0300  | serine protease Do, putative                                                     | +    |
| DR_0327  | periplasmic serine protease                                                      | +    |
| DR_1756  | periplasmic serine protease Do                                                   | +    |
| DR_1769  | serine/threonine protein kinase-like protein                                     | +    |
| DR_1937  | serine protease                                                                  | +    |
| DR_2325  | serine protease                                                                  | +    |
| DR_A0064 | serine protease                                                                  | +    |
| DR_0025  | HSP20 family protein                                                             | +    |
| DR_0116  | hypothetical protein                                                             | ++   |
| DR_0505  | 5'-nucleotidase family protein                                                   | +++  |
| DR_0560  | hypothetical protein                                                             | ++++ |
| DR_0581  | hypothetical protein                                                             | +++  |
| DR_0769  | hypothetical protein                                                             | +++  |
| DR_0960  | hypothetical protein                                                             | +++  |
| DR_0969  | hypothetical protein                                                             | +++  |
| DR_0972  | hypothetical protein                                                             | +++  |
| DR_1021  | hypothetical protein                                                             | +++  |
| DR_1114  | hypothetical protein                                                             | +++  |
| DR_1140  | hypothetical protein                                                             | +++  |
| DR_1180  | hypothetical protein                                                             | ++   |
| DR_1202  | hypothetical protein                                                             | ++   |
| DR_1306  | hypothetical protein                                                             | ++   |
| DR_1370  | hypothetical protein                                                             | ++   |
| DR_1388  | hypothetical protein                                                             | ++   |

---

---

|          |                                                              |    |
|----------|--------------------------------------------------------------|----|
| DR_1407  | hypothetical protein                                         | ++ |
| DR_1484  | hypothetical protein                                         | ++ |
| DR_1714  | hypothetical protein                                         | ++ |
| DR_1737  | signal peptidase I                                           | +  |
| DR_1768  | hypothetical protein                                         | ++ |
| DR_1923  | hypothetical protein                                         | ++ |
| DR_1964  | general secretion pathway protein E                          | +  |
| DR_2070  | membrane lipoprotein                                         | ++ |
| DR_2317  | potassium channel subunit beta                               | +  |
| DR_2620  | cytochrome c oxidase subunit I                               | +  |
| DR_A0069 | cleavage and polyadenylation specificity factor-like protein | +  |
| DR_A0241 | beta lactamase-like protein                                  | +  |
| DR_A0302 | hypothetical protein                                         | ++ |
| DR_B0037 | hypothetical protein                                         | ++ |
| DR_B0041 | hypothetical protein                                         | ++ |
| DR_B0092 | Dps family DNA-binding stress response protein               | +  |

---

a, Relative protein abundance was indicated by the index value ( $i$  = unweighted spectrum count of each protein/mass). +,  $i \leq 0.20$ ; ++,  $0.20 < i \leq 0.40$ ; +++,  $0.40 < i \leq 0.60$ ; +++++,  $0.60 < i \leq 0.80$ ; ++++++,  $i > 0.80$ .



**Table S5. Proteins identified in the SDS-PAGE gel containing SlpA with a molecular weight of 123 kDa by MS<sup>a</sup>**

| <b>Gene Number</b> | <b>Protein Description</b>                                  | <b>Relative Abundance Index<sup>b</sup></b> |
|--------------------|-------------------------------------------------------------|---------------------------------------------|
| <b>DR_2577</b>     | <b>S-layer protein SlpA</b>                                 | +++                                         |
| DR_2508            | hexagonally packed intermediate-layer surface protein       | ++                                          |
| DR_B0037           | hypothetical protein                                        | +                                           |
| DR_0363            | peptide ABC transporter periplasmic peptide-binding protein | +                                           |
| DR_1124            | SLH family protein                                          | +                                           |
| DR_1185            | S-layer-like array-like protein                             | +                                           |
| DR_0116            | hypothetical protein                                        | +                                           |

a, The protein band containing SlpA with a molecular weight of 123 kDa in the wild type from the SDS-PAGE experiment (Fig. 7c) was subjected to MS analysis. b, Relative protein abundance was indicated by the index value ( $i$  = unweighted spectrum count of each protein/mass). +,  $i \leq 0.20$ ; ++,  $0.20 < i \leq 0.40$ ; +++,  $0.40 < i \leq 0.60$ ; +++++,  $0.60 < i \leq 0.80$ ; ++++++,  $i > 0.80$ .

**Figure S1. DNA sequence comparison of the re-sequenced DR\_146T loci with NCBI data.** Five gaps and four base errors in the NCBI gene loci were shown (red box). The gaps led to invalid start and/or invalid stop codons (black dashed box) in the predicted DR\_1462, DR\_1461 and DR\_1460 sequences. The start and stop codons of DR\_146T were marked with black solid line box.

|       |       |                                                                                                                             |       |
|-------|-------|-----------------------------------------------------------------------------------------------------------------------------|-------|
|       |       | DR_146T start codon →                                                                                                       |       |
| Query | 1     | <span style="border: 1px solid black; padding: 0 2px;">GTG</span> AGGGCCAAAGCGgcgccccgcgccccccccggcgccgcccgcgcccggcTGGCCC   | 60    |
| Sbjct | 1     | GTGAGGGCCAAAGCGGCGCCCGCGCCCGCCCGGCGCCGC-C-G-GCGCCGCTGGCCC                                                                   | 58    |
| Query | 61    | TGGTGGGTGCTGGGCGGGCGCTGCTGCTCGGCGCGGTGGCTACGCCCCGCAACTGTTC                                                                  | 120   |
| Sbjct | 59    | TGGTGGCTGTGGGCGGGCGCTGCTGCTCGGCGCGGTGGCTACGCCCCGCAACTGTTC                                                                   | 118   |
|       |       | DR_1462 start codon →                                                                                                       |       |
| Query | 4201  | GACCTCAGCGCCTGCGCCTGAACGTGAGCGGCCCTACCTCAGTGGCGGGCAGCGGC                                                                    | 4260  |
| Sbjct | 4199  | GACCTCAGCGCCTGCGCCTGAACGTGAGCGGCCCTACCTCAGTGGCGGGCAGCGGC                                                                    | 4258  |
|       |       | DR_1461 start codon →                                                                                                       |       |
| Query | 4321  | <span style="border: 1px solid black; padding: 0 2px;">GCC</span> CGCGTGGTCATTCCGGCTCAGAGCTTCCCGCTGCGGGTGCGCCCGGCCACCGCGAGC | 4380  |
| Sbjct | 4319  | -CCCGCTGGTCATTCCGGCTCAGAGCTTCCCGCTGCGGGTGCGCCCGGCCACCGCGAGC                                                                 | 4377  |
| Query | 4381  | CTCAGGCGAGGCGGCTGACTACGCGAGCGGGCGCTGGTCGGGCGGGTTGGACGCGGCC                                                                  | 4440  |
| Sbjct | 4378  | CTCAGGCGAGGCGGCTGACTACGCGAGCGGGCGCTGGTCGGGCGGGTTGGACGCGGCC                                                                  | 4437  |
|       |       | DR_1462 stop codon                                                                                                          |       |
| Query | 4681  | CGCCTCGAACGGACCCTTTATCAGAACGAACCGCTCAACCTACCGCGGCCGTGGACTGG                                                                 | 4740  |
| Sbjct | 4678  | CGCCTCGAACGGACCCTTTATCAGAACGAACCGCTCAACCTACCGCGG-CGTGGACTGG                                                                 | 4736  |
| Query | 5881  | CAGCGGGCGAACGGACAGGCGCAGGTGGACCTACGGCGCAGGCCAGCGCGCGCAGGGC                                                                  | 5940  |
| Sbjct | 5877  | CAGCGGGCGAACGGACAGGCGCAGGTGGACCTACGGCGCAKGGCCAGCGCGCGCAGGGC                                                                 | 5936  |
| Query | 7201  | GCGGCGGTGCGAACTTTCCGGCGACGTGCAGGCGAGCTACGGTCCCGGGAACGCCGAGCTG                                                               | 7260  |
| Sbjct | 7197  | GCGGCGGTGCGAACTTTCCGGCGACGTGCAGGCGAGCTACGGTCCCGGGAACGCCGAGCTG                                                               | 7256  |
| Query | 7981  | GCGCTGACGGTGAAGACGGCTTCCCTTCCCGACCCCTCACCTGCGCGGCGACGGAGAg                                                                  | 8040  |
| Sbjct | 7977  | GCGCTGACGGTGAAKACGGCTTCCCTTCCCGACCCCTCACCTGCGCGGCGACGGAGAG                                                                  | 8036  |
| Query | 8041  | ggggggTATGCCCTCAGCGCGGGCAGCTCGGTACGGGGAACTCACCTCACGCCGGG                                                                    | 8100  |
| Sbjct | 8037  | GGGGGTATGCCCTCAGCGCGGGCAKCTCGGTACGGGGAACTCACCTCACGCCGGG                                                                     | 8096  |
| Query | 9901  | GTCTTCGGGCAGGGCACCITGCAGGCGTCCGCTCGGCGCGGTGCTCGCCGCCGTCGCG                                                                  | 9960  |
| Sbjct | 9897  | GTCTTCGGGCAGGGCA-CITGCAGGCGTCCGCTCGGCGCGGTGCTCGCCGCCGTCGCG                                                                  | 9955  |
| Query | 9961  | GGTCCACGCCGGGCGAGGGCGTGGTACCAGGCGGTTGTTTTCCGTTTTCCCCCTCGCC                                                                  | 10020 |
| Sbjct | 9956  | GGTCCACGCCGGGCGAGGGCGTGGTACCAGGCGGTTGTTTTCCGTTTTCCCCCTCGCC                                                                  | 10015 |
|       |       | DR_1460 start codon →                                                                                                       |       |
| Query | 10021 | GACCCGCTGGCCGGGCGCGCCTCGGTGGTCGCCGAGCGCATCCGGGTGAGCGCGCGCCG                                                                 | 10080 |
| Sbjct | 10016 | GACCCGCTGGCCGGGCGCGCCTCGGTGGTCGCCGAGCGCATCCGGGTGAGCGCGCGCCG                                                                 | 10075 |
|       |       | DR_1461 stop codon                                                                                                          |       |
| Query | 12001 | GGCCGC <span style="border: 1px solid black; padding: 0 2px;">TGA</span> 12009 DR_146T stop codon                           |       |
| Sbjct | 11996 | GGCCGC <span style="border: 1px dashed black; padding: 0 2px;">TGA</span> 12004 DR_1460 stop codon                          |       |

**Figure S2. Predicted protein sequence encoded by DR\_146T compared with the predicted protein sequences of DR\_1462, DR\_1461 and DR\_1460 from NCBI database. Point mutation sites were indicated by red rectangle in the sequences.**

```

Re-seq 1 MRAKAAPRARPRRRRAPRWPWW 23 V 1440 PARVVIPAQSFPLR-----VRPATASLTA- 1463
DR_1462 ----- 1 M 1418 P-----PAWSFRLRASRCGCARPPRASRQAA 1443
      A A G G L G V P

Re-seq 1464 GGLTYASGRWSGGLDAAYALWTGELKRAGRVRIVGDGKVLAAARPSGPLNGRVGLLPTLSGEVSTDVAPLLPT 1535
DR_1461 1 MRRRRAICVPCAAPCACARKHWGAAPPRGHSGSELPAAAGAPGHREPHGRRPDLRERALVGRVGRGLRPVDRR 72
      A A R R

Re-seq 1536 LPGDLRAALRPGQLFAKVTATGATLRLERTLYQNEPLNLTA ----- 1577
DR_1461 73 AETGGAGPHCGRRQGARGAALWSPERAGRPPSYSQRRSFDGRGAAAADLAGRPTRGFASRSTVVRQGHSHGRH 145
      A A R R

Re-seq ----- 1578 VD 1974 2414 2665 2689
DR_1461 146 APRTDPLSERTAQPHER 163 VD LTAQGG SYGAG TVKTA AGQLG TLQALPL 3313
      VD *** LTA GQ *** SY AG *** TV TA *** AG LG *** T +
      LTAGG SYAAG TVXTA AGXLG TCRRCRS 1888
      559 999 1250 1274

Re-seq 3314 GAVLAAVAGSTPGE ----- 3327
DR_1461 1889 ARCSPPSRAPRRARAWSPGRFVSVSPSTRWPGAPRWSPSASG 1940

Re-seq 3328 VVT GR 4002
      +VT *** GR
DR_1460 1 MVT GR 675

```

**Figure S3. Comparison of colony phenotype of the wild type with those of the mutants.** *D. radiodurans* wild type colonies were circular and smooth, while the colonies of DR\_146T mutant were ring-shaped and rugose. DRWT, *D. radiodurans* wild type;  $\Delta$ DR\_146T-DUF490, mutant deficient in DUF490 of DR\_146T;  $\Delta$ DR\_146T, mutant deficient in DR\_146T;  $\Delta$ DR\_2577, mutant deficient in DR\_2577. The inset diagram shows an amplified colony.

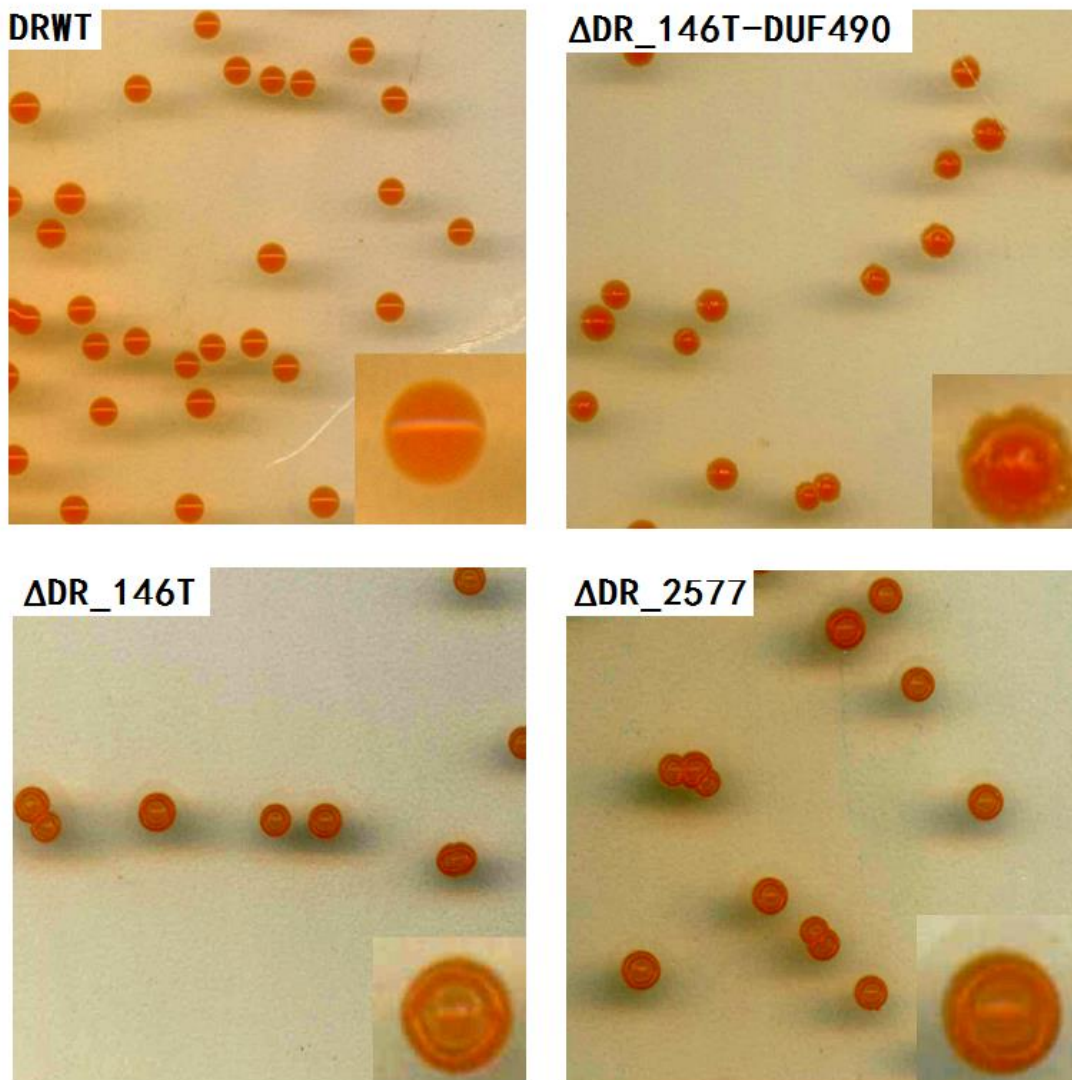

**Figure S4. Settlement of bacterial cultures.** *D. radiodurans* wild type and mutant cultures were placed on the table following vibration at room temperature. DRWT, *D. radiodurans* wild type;  $\Delta$ DR\_146T-DUF490, mutant deficient in DUF490 of DR\_146T;  $\Delta$ DR\_146T, mutant deficient in DR\_146T;  $\Delta$ DR\_2577, mutant deficient in DR\_2577.

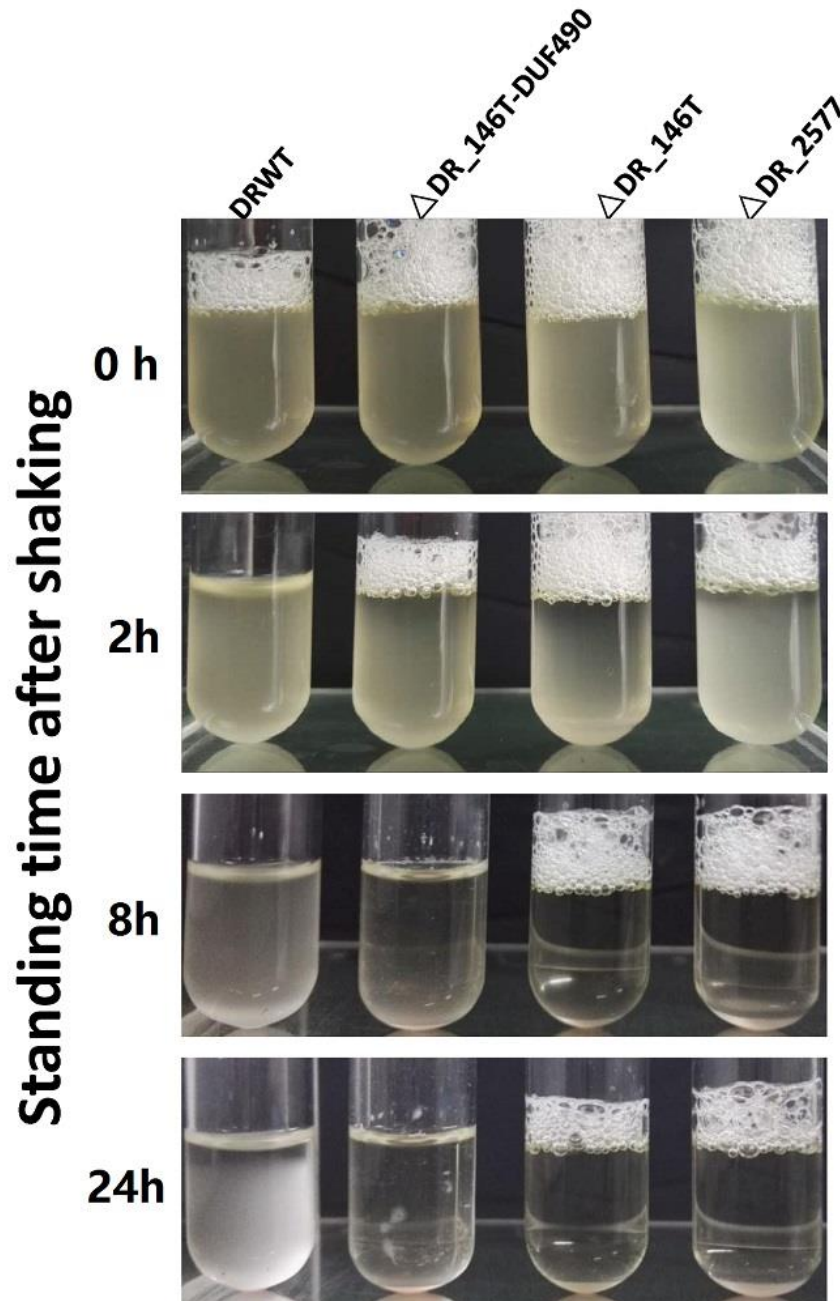

**Figure S5. Peptides of DR\_146T detected in the cell envelope of *D. radiodurans* wild type cells by MS analysis.** The MS patterns for each peptide matched to DR\_146T are shown (a-i) and the peptides are listed (j). The peptide identification was performed using the MS data obtained to search against the updated *D. radiodurans* protein sequence database supplemented with the correct DR\_146T sequence.

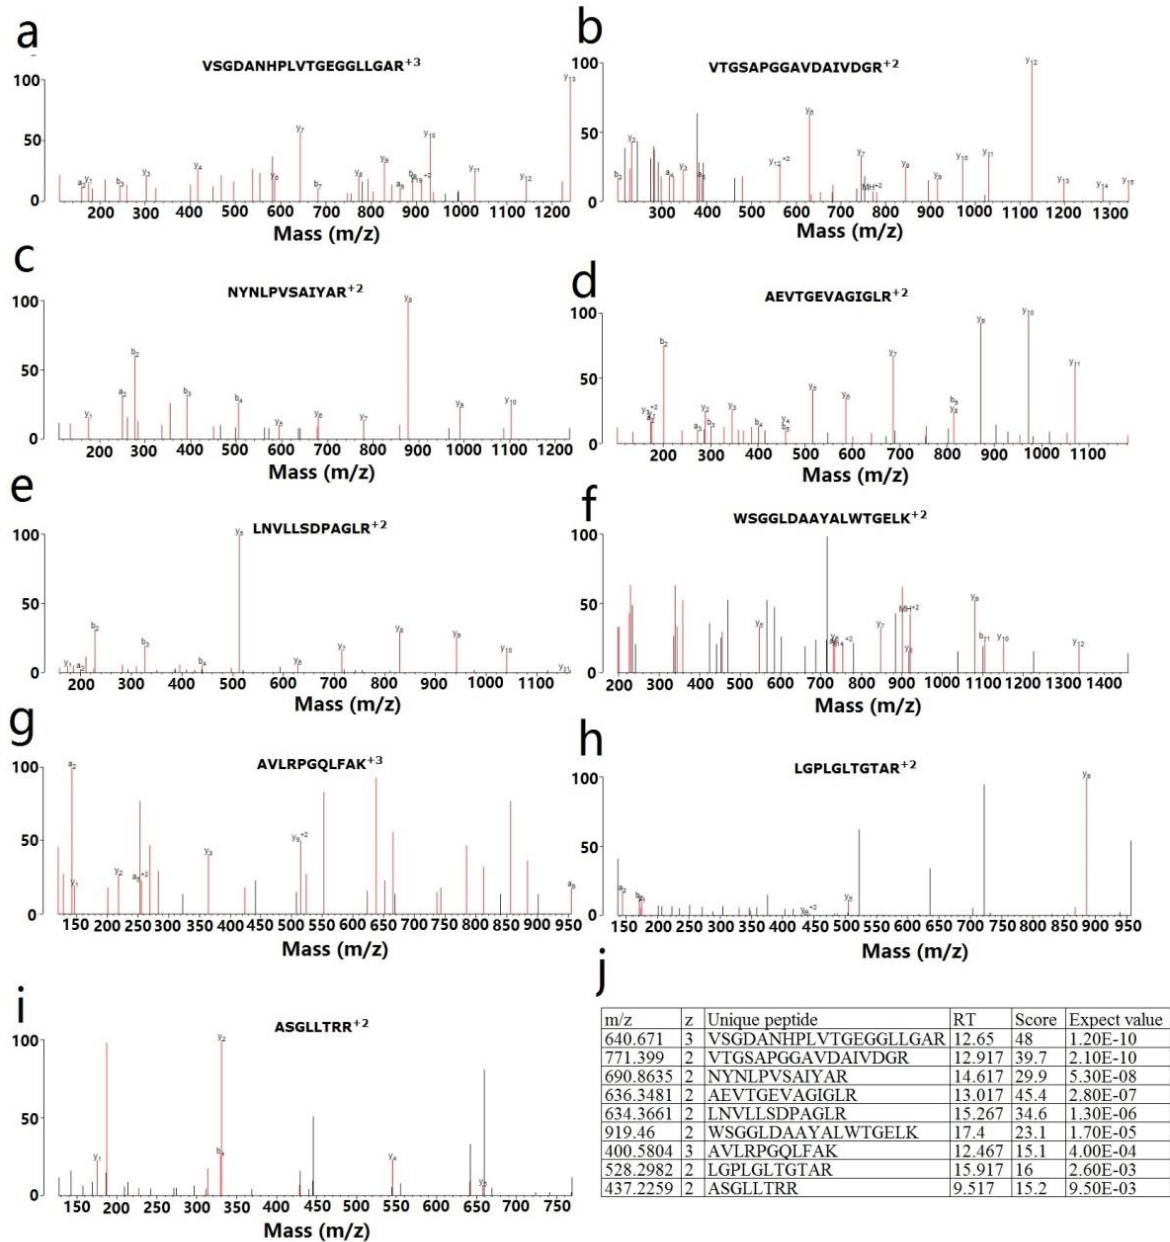

Supplement: srep45929-s1.pdf [file srep45929-s1.pdf]
